# Supplementary material
Source: HighWire-hosted journal article supplement (https://bjsm.bmj.com/content/54/22/1314)
Supplement: inline-supplementary-material-2 [file inline-supplementary-material-2.pdf]

Supplementary Table 1. First version of statements and results of first round of voting

| Statement                                                                                                                                                                                                                             | Utility Mean (SD) Range | Feasibility Mean (SD) Range |
|---------------------------------------------------------------------------------------------------------------------------------------------------------------------------------------------------------------------------------------|-------------------------|-----------------------------|
| 1. Ensure education provided to athletes/service members is engaging, interactive, and allows for discussion.                                                                                                                         | 8.37 (0.96)<br>6-9      | 6.68 (1.34)<br>4-9          |
| 2. Provide education to athletes/service members addressing the benefits of early concussion symptom disclosure.                                                                                                                      | 8.32 (1.83)<br>1-9      | 7.89 (1.88)<br>1-9          |
| 3. Provide education to athletes/service members addressing short-term outcomes of early concussion symptom disclosure                                                                                                                | 7.32 (2.06)<br>3-9      | 7.37 (1.74)<br>4-9          |
| 4. Provide education to athletes/service members addressing long-term outcomes of early concussion symptom disclosure                                                                                                                 | 7.21 (2.10)<br>3-9      | 6.63 (2.56)<br>1-9          |
| 5. Provide education to athletes/service members addressing occupation-related outcomes of early concussion symptom disclosure                                                                                                        | 7.58 (1.64)<br>3-9      | 7.26 (2.10)<br>1-9          |
| 6. Provide education to athletes/service members addressing athletic-related outcomes of early concussion symptom disclosure                                                                                                          | 8.11 (1.37)<br>5-9      | 7.99 (1.44)<br>5-9          |
| 7. Provide education to athletes/service members addressing academic outcomes of early concussion symptom disclosure                                                                                                                  | 7.84 (1.64)<br>3-9      | 7.47 (2.01)<br>1-9          |
| 8. Provide education to athletes/service members addressing social outcomes of early concussion symptom disclosure                                                                                                                    | 6.26 (2.21)<br>3-9      | 5.74 (2.38)<br>1-9          |
| 9. Provide education to athletes/service members that addresses concussion-related misperceptions                                                                                                                                     | 7.42 (1.50)<br>3-9      | 7.37 (1.57)<br>3-9          |
| 10. Provide education to athletes/service members that is focused on the reporting decision                                                                                                                                           | 6.28 (2.65)<br>1-9      | 6.11 (2.93)<br>1-9          |
| 11. Provide education to athletes/service members aimed at increasing their skill and confidence in concussion symptom disclosure                                                                                                     | 7.06 (2.48)<br>1-9      | 6.17 (2.60)<br>2-9          |
| 12. Provide education to athletes aimed at shaping team norms supportive of early concussion symptom disclosure.                                                                                                                      | 7.32 (2.16)<br>3-9      | 6.58 (2.09)<br>2-9          |
| 13. Provide evidence-based concussion education to coaches aimed at shaping team environments supportive of early concussion symptom disclosure.                                                                                      | 7.53 (1.98)<br>1-9      | 6.26 (2.31)<br>1-9          |
| 14. Provide evidence-based concussion education to sports medicine staff aimed at supporting athletes in early concussion symptom disclosure.                                                                                         | 7.05 (2.80)<br>1-9      | 7.42 (2.06)<br>3-9          |
| 15. Provide evidence-based concussion education to parents/guardians aimed at supporting athletes in early concussion symptom disclosure                                                                                              | 7.84 (1.34)<br>5-9      | 5.68 (2.11)<br>2-9          |
| 16. Identify if there are additional key stakeholders who are in frequent contact with athletes/service members following a concussion. Provide them with evidence-based concussion education aimed at supporting symptom disclosure. | 7.00 (2.29)<br>1-9      | 5.32 (2.06)<br>1-9          |
| 17. Integrate messaging about the importance of complete concussion symptom disclosure through the recovery process.                                                                                                                  | 7.26 (2.13)<br>3-9      | 7.16 (2.03)<br>3-9          |
| 18. Work with stakeholders (including athletes/service members) to select evidence-based approach(es) to concussion education that meet local needs                                                                                   | 7.26 (2.00)<br>3-9      | 5.53 (2.41)<br>2-9          |
| 19. Regardless of the educational approach(es) chosen, provide practical information to all stakeholders that is locally tailored, addressing institutional resources and policies.                                                   | 7.89 (1.24)<br>4-9      | 6.37 (2.09)<br>3-9          |
| 20. Messaging related to early concussion symptom disclosure should be shared more than once annually and from multiple sources.                                                                                                      | 7.68 (2.40)<br>1-9      | 6.95 (2.50)<br>1-9          |
| 21. Choose, communicate, and embody institutional values that prioritize safety over athletic performance.                                                                                                                            | 7.32 (2.21)<br>2-9      | 5.89 (2.35)<br>1-9          |
| 22. Work with stakeholders (including athletes/service members) to identify and address organizational barriers to early concussion symptom disclosure                                                                                | 7.63 (1.21)<br>6-9      | 5.79 (1.69)<br>2-9          |
| 23. Design and integrate messages, incentives and rituals into team environments that reinforce the autonomous motivation of athletes/service members                                                                                 | 6.72 (1.96)<br>1-9      | 4.61 (1.72)<br>1-8          |
| 24. Evaluate concussion education for its local effectiveness in changing athlete/service member disclosure behavior using rigorous methods.                                                                                          | 7.26 (2.23)<br>2-9      | 5.83 (2.18)<br>2-9          |

Supplementary Table 2. Revised statements and results of second round of voting

| Statement                                                                                                                                                                                                                          | Utility Mean (SD) Range | Feasibility Mean (SD) Range |
|------------------------------------------------------------------------------------------------------------------------------------------------------------------------------------------------------------------------------------|-------------------------|-----------------------------|
| 1. Actively collaborate with organizational stakeholders (including athletes/service members) to identify and address organizational barriers to concussion symptom disclosure                                                     | 8.20 (0.70)<br>7-9      | 7.45 (0.94)<br>6-9          |
| 2. Actively collaborate with organizational stakeholders (including athletes/service members) to select approaches to athlete/service member education about concussion that are engaging, interactive, and that foster discussion | 8.63 (0.60)<br>7-9      | 7.89 (0.99)<br>6-9          |
| 3. Provide athletes/service members with education addressing the short-term outcomes of early concussion symptom disclosure (e.g., academic, athletic, occupational)                                                              | 8.85 (0.37)<br>8-9      | 8.55 (0.60)<br>7-9          |
| 4. Provide athletes/service members with education addressing the long-term outcomes of concussion                                                                                                                                 | 8.00 (2.03)<br>2-9      | 7.85 (1.76)<br>2-9          |
| 5. Provide athletes/service members with education that acknowledges the potential reporting dilemma (e.g., tradeoffs, concerns about what might happen next, etc.)                                                                | 8.35 (1.09)<br>5-9      | 8.00 (1.08)<br>5-9          |
| 6. Provide athletes/service members with opportunities to practice concussion symptom disclosure procedures                                                                                                                        | 8.20 (1.01)<br>6-9      | 6.95 (1.88)<br>3-9          |
| 7. Share evidence-based strategies (e.g., bystander education, team discussion) with medical staff, coaches and athletes/service members that shape team norms supporting concussion symptom disclosure                            | 8.32 (0.67)<br>7-9      | 7.63 (1.07)<br>6-9          |
| 8. Provide opportunities for athletes/service members and their coaches/leaders to discuss and establish team/group values that are supportive of concussion disclosure                                                            | 8.25 (0.79)<br>7-9      | 6.95 (1.39)<br>4-9          |
| 9. Provide athletes/service members with education addressing the role they can play in encouraging peers to disclose possible concussion symptoms                                                                                 | 8.75 (0.55)<br>7-9      | 8.15 (0.81)<br>7-9          |
| 10. Provide coaches with evidence-based concussion education that is aimed at supporting athletes in concussion symptom disclosure.                                                                                                | 8.90 (0.31)<br>8-9      | 8.35 (0.99)<br>7-9          |
| 11. Provide sports medicine staff with information about how to engage coaches in supporting athletes in concussion symptom disclosure                                                                                             | 8.26 (1.24)<br>6-9      | 6.95 (2.22)<br>1-9          |
| 12. Make information about how to support athlete/service member concussion disclosure available to parents/guardians                                                                                                              | 8.35 (1.09)<br>6-9      | 8.10 (1.21)<br>5-9          |
| 13. Make information about how to support athlete/service member concussion disclosure available to other key site-specific stakeholders.                                                                                          | 8.45 (0.94)<br>5-9      | 7.80 (1.40)<br>3-9          |
| 14. Provide athletes/service members and other key stakeholders with site specific information regarding institutional concussion resources, policies and processes                                                                | 8.25 (1.33)<br>5-9      | 7.85 (1.90)<br>2-9          |
| 15. Share messaging about concussion symptom disclosure on an ongoing basis throughout the year and in a variety of ways                                                                                                           | 8.63 (0.68)<br>7-9      | 7.84 (1.21)<br>5-9          |
| 16. Communicate and document institutional values that emphasize safety and its role in athletic performance.                                                                                                                      | 8.00 (1.56)<br>4-9      | 7.42 (2.01)<br>1-9          |
| 17. Provide education to coaches about the benefits of coaching practices that foster intrinsic sport participation motivation                                                                                                     | 6.50 (2.80)<br>1-9      | 5.65 (2.78)<br>1-9          |
| 18. Evaluate the effectiveness of concussion education approach(es) selected in changing athlete/service member concussion symptom disclosure behavior.                                                                            | 8.68 (0.48)<br>8-9      | 7.11 (1.88)<br>3-8          |
| 19. Provide education to coaches and sports medicine staff on how to structure team incentives to support athlete/service member willingness to disclose concussion symptoms                                                       | 8.05 (1.05)<br>6-9      | 6.75 (1.62)<br>3-9          |

Supplementary Table 3. Revised statements and results of third round of voting

| Statement                                                                                                                                                                           | Utility<br>Mean (SD)<br>Range | Feasibility<br>Mean (SD)<br>Range |
|-------------------------------------------------------------------------------------------------------------------------------------------------------------------------------------|-------------------------------|-----------------------------------|
| 1. Provide athletes/service members with education addressing what is known about possible long-term manifestations of concussion and head injury                                   | 8.06 (1.53)<br>4-9            | 7.56 (1.79)<br>3-9                |
| 2. Provide opportunity for team members and coaches/leaders to discuss and establish team values that are supportive of concussion symptom disclosure                               | 8.63 (0.50)<br>8-9            | 7.38 (1.36)<br>5-9                |
| 3. Communicate in a deliberate manner institutional values that emphasize safety and its importance in athletic performance.                                                        | 8.44 (0.73)<br>7-9            | 7.88 (1.02)<br>6-9                |
| 4. Provide education to coaches about the benefits of coaching practices that foster intrinsic sport participation motivation and its relationship to concussion symptom disclosure | 7.06 (2.14)<br>4-9            | 5.69 (2.09)<br>1-9                |

Supplementary Table 4. Statements included in final recommendations and scores from voting

| Statement                                                                                                                                                                                                                                                                         | Utility<br>Mean (SD)<br>Range | Feasibility<br>Mean (SD)<br>Range |
|-----------------------------------------------------------------------------------------------------------------------------------------------------------------------------------------------------------------------------------------------------------------------------------|-------------------------------|-----------------------------------|
| 1. Provide athletes/service members with education that addresses the potential dilemma individuals face when deciding to disclose a concussion (e.g., tradeoffs, concerns about what might happen next, knowing how to report, etc.).                                            | 8.35 (1.09)<br>5-9            | 8.00 (1.08)<br>5-9                |
| 2. Provide athletes/service members with education that addresses short-term benefits of early concussion symptom disclosure (e.g., athletic, academic, occupational).                                                                                                            | 8.85 (0.37)<br>8-9            | 8.55 (0.60)<br>7-9                |
| 3. Provide athletes/service members with education that addresses what is known about possible long-term manifestations of concussion and head injury.                                                                                                                            | 8.06 (1.53)<br>4-9            | 7.56 (1.79)<br>3-9                |
| 4. Provide athletes/service members with education that addresses concussion-related misperceptions (e.g., knowledge gaps).                                                                                                                                                       | 7.42 (1.50)<br>3-9            | 7.37 (1.57)<br>3-9                |
| 5. Provide athletes/service members with education that addresses site-specific information regarding institutional concussion resources and policies (e.g., steps to take if an individual suspects they have a concussion).                                                     | 8.25 (1.33)<br>5-9            | 7.85 (1.90)<br>2-9                |
| 6. Actively collaborate with organizational stakeholders (including coaches/commanders, primary health care providers, athletes/service members, military chain of command) to select concussion education approaches that are engaging, interactive, and that foster discussion. | 8.63 (0.60)<br>7-9            | 7.89 (0.99)<br>6-9                |
| 7. Share messaging about concussion symptom disclosure on a regular basis and in a variety of ways (e.g., formal education, informal conversation, posters).                                                                                                                      | 8.63 (0.68)<br>7-9            | 7.84 (1.21)<br>5-9                |
| 8. Integrate messaging about the importance of complete concussion symptom disclosure throughout the recovery process.                                                                                                                                                            | 7.26 (2.13)<br>3-9            | 7.16 (2.03)<br>3-9                |
| 9. Provide coaches/leaders in the military chain of command with evidence-based concussion education that is aimed at supporting athletes/service members in concussion symptom disclosure.                                                                                       | 8.90 (0.31)<br>8-9            | 8.35 (0.99)<br>7-9                |
| 10. Provide sports medicine/front line medical staff with strategies about how to engage coaches/leaders in the military chain of command in supporting athletes/service members in concussion symptom disclosure.                                                                | 8.26 (1.24)<br>6-9            | 6.95 (2.22)<br>1-9                |
| 11. Provide easily accessible information to parents/guardians about how to support athlete/service member concussion symptom disclosure.                                                                                                                                         | 8.35 (1.09)<br>6-9            | 8.10 (1.21)<br>5-9                |
| 12. Provide easily accessible information to other key site-specific stakeholders (e.g., student-life administrators, faculty athletic representatives, leadership, chain of command) about how to support athlete/service member concussion symptom disclosure.                  | 8.45 (0.94)<br>5-9            | 7.80 (1.40)<br>3-9                |
| 13. Provide athletes/service members with education that addresses the role they can play in encouraging peers to disclose possible concussion symptoms (e.g., share evidence-based bystander education programming).                                                             | 8.75 (0.55)<br>7-9            | 8.15 (0.81)<br>7-9                |
| 14. Provide opportunity for team members and coaches/leaders in the military chain of command to discuss and establish team values that are supportive of concussion symptom disclosure.                                                                                          | 8.63 (0.50)<br>8-9            | 7.38 (1.36)<br>5-9                |
| 15. Actively collaborate with organizational stakeholders (including coaches/leaders in the military chain of command, primary health care providers, athletes/service members) to identify and address organizational barriers to concussion symptom disclosure.                 | 8.20 (0.70)<br>7-9            | 7.45 (0.94)<br>6-9                |
| 16. Evaluate the effectiveness of institutionally selected concussion education approaches in changing athlete/service member concussion symptom disclosure behavior.                                                                                                             | 8.68 (0.48)<br>8-9            | 7.11 (1.88)<br>3-8                |
| 17. Communicate in a deliberate manner institutional values that emphasize safety and its importance in athletic performance/military readiness.                                                                                                                                  | 8.44 (0.73)<br>7-9            | 7.88 (1.02)<br>6-9                |

Supplementary Table 5. Mind Matters Task Force Participants

| Name                        | Position and Institution                                          | Position                                                                                |
|-----------------------------|-------------------------------------------------------------------|-----------------------------------------------------------------------------------------|
| Steve Corman, PhD           | Arizona State University, Tempe AZ                                | Professor, Hugh Downs School of Human Communication                                     |
| Bradley Adame, PhD          | Arizona State University, Tempe AZ                                | Associated Professor, Human Downs School of Human Communication                         |
| J. Douglas Coatsworth, PhD  | Colorado State University, Fort Collins CO                        | Professor and Director of the Applied Developmental Science Program                     |
| Christopher D'Lauro, PhD    | Air Force Academy, CO                                             | Associate Professor of Psychology                                                       |
| Alissa Wicklund, PhD        | Orthopedic & Spine Center of the Rockies, Fort Collins, CO        | Neuropsychologist                                                                       |
| Heidi Wayment, PhD          | Northern Arizona University, Flagstaff AZ                         | Professor, Social and Health Psychology                                                 |
| Debbie Craig                | Northern Arizona University, Flagstaff AZ                         | Professor and Program Director of Athletic Training Education                           |
| Ann Huffman, PhD            | Northern Arizona University, Flagstaff AZ                         | Professor, Industrial-Organizational Psychology                                         |
| Julianne Schmidt, PhD, ATC  | University of Georgia, Athens GA                                  | Associate Professor, Department of Kinesiology (Exercise Science, Athletic Training)    |
| Michelle Weber Rawlins, PhD | A.T Still University, Mesa AZ                                     | Post-Doctoral Scholar                                                                   |
| Johna Register-Mihalik, PhD | University of North Carolina, Chapel Hill NC                      | Assistant Professor, Department of Exercise and Sport Science                           |
| Melissa Kay, PhD, ATC       | Southern Mississippi University, Hattiesburg MS                   | Assistant Professor of Athletic Training                                                |
| Jeff Milroy, DrPH, MPH      | University of North Carolina, Greensboro NC                       | Assistant Professor, Public Health Education                                            |
| Dee Warmath, PhD            | University of Georgia, Athens GA                                  | Assistant Professor, Consumer Economics                                                 |
| Andrew Winterstein ATC, PhD | University of Wisconsin, Madison WI                               | Clinical Professor, Department of Kinesiology                                           |
| William Ernst, PhD          | Chestnut Hill College, Philadelphia PA                            | Associate Professor of Psychology                                                       |
| Meredith Kneavel, PhD       | LaSalle University, Philadelphia PA                               | Associate Dean, School of Nursing and Health Sciences                                   |
| Steven Broglio, PhD         | University of Michigan, Ann Arbor MI                              | Professor of Athletic Training                                                          |
| Mike McCrea, PhD            | Medical College of Wisconsin, Milwaukee WI                        | Professor of Neurosurgery and Neurology                                                 |
| Tom McAllister, MD          | Indiana University, Indianapolis IN                               | Professor and Chairman, Indiana University School of Medicine, Department of Psychiatry |
| Robert Bowlsby              | Big 12 Conference                                                 | Conference Commissioner                                                                 |
| Nicki Moore, PhD            | Colgate University, Hamilton NY                                   | Director of Athletics                                                                   |
| Paul Pasquina, MD           | Uniformed Services University of the Health Sciences, Bethesda MD | Professor and Department Chair, Physical Medicine and Rehabilitation                    |
| Christian Ellsworth         | University of Northern Iowa, Cedar Fall IA                        | Student-Athlete                                                                         |
| Julie Ruppert               | Northeast Conference                                              | Conference Commissioner                                                                 |
| R.T. Floyd                  | University of West Alabama, Livingston AL                         | Athletics Health Care Administrator                                                     |
| Mariah Wysocki              | Bloomfield College, Bloomfield NJ                                 | Student-Athlete                                                                         |
| Terry Ruppert               | Wilmington College, Wilmington OH                                 | Vice President of Athletics Administration/Director of Athletics                        |
| Scott McGuinness            | Washington and Jefferson College, Washington PA                   | Director of Athletics                                                                   |
| Charles Brown, PhD          | Pennsylvania State University, Behrend, PA                        | Faculty Athletics Representative                                                        |
| NJ Kim                      | Emory University, Atlanta GA                                      | Student-Athlete                                                                         |
| Carol Mills                 | Indiana University-Purdue University, Indianapolis IN             | Student-Athlete                                                                         |
| Ross Silverman, JD MPH      | Indiana University-Purdue University, Indianapolis IN             | Professor, Fairbanks School of Public Health                                            |

---

**NCAA and Department of Defense Staff<sup>1</sup>**

Elizabeth Fudge, Office of the Assistant Secretary of Defense for Health Affairs, Health Readiness Policy & Oversight Executive Officer, Lead Program Analyst

Dallas Hack, MD MPH, NCAA Sport Science Institute, Contractor

Kathy Lee, MS, United States Defense Health Agency, Defense and Veterans Brain Injury Center Deputy Director, Defense and Veterans Brain Injury Center

Kimberly McCoy-Stafford, U.S. Army Office of the Surgeon General

MAJ Cecilia Najera, PhD, U.S. Army Office of the Surgeon General, TBI Program Office

Therese West, DNP MSN, Casualty Care Research Program, Defense Health Program Manager

Theresa Lattimore, MSN NP-C, U.S. Army Office of the Surgeon General Director, Army Traumatic Brain Injury Program

Brian Hainline, MD, NCAA Sport Science Institute, NCAA Chief Medical Officer

Lydia Bell, PhD, NCAA Research, Associate Director

Eric Hartung, EdD, NCAA Research, Associate Director

Emily Kroshus ScD MPH, University of Washington & NCAA Contractor

Keke Liu, MA, NCAA Research, Associate Director

John Parsons PhD ATC, NCAA Sport Science Institute, Managing Director

Brian Burnsed, NCAA Communications, Associate Director

LaGwyn Durden, ATC, NCAA Sport Science Institute, Director

Jessica Kerr, JD, NCAA Office of Legal Affairs

Paul Roetert, PhD, NCAA Sport Science Institute, Director

Jessica Wagner, MPH RN, NCAA Sport Science Institute, Associate Director

---

<sup>1</sup>Participated in Task Force meetings but were not eligible to vote on consensus statements
